# Supplementary material for: Widespread occurrence of 5-methylcytosine in human coding and non-coding RNA
Source: PubMed Central journal article supplement — Nucleic Acids Res. 2012 Feb 16;40(11):5023–33. doi: 10.1093/nar/gks144 (PMC3367185; doi:10.1093/nar/gks144), 2012-02-16
Supplement: supp_gks144_Squires_Supplementary_Figures.pdf [file supp_gks144_Squires_Supplementary_Figures.pdf]

**Supplementary Figures for Squires et al. ‘Widespread occurrence of 5-methylcytosine in human coding and noncoding RNA’**

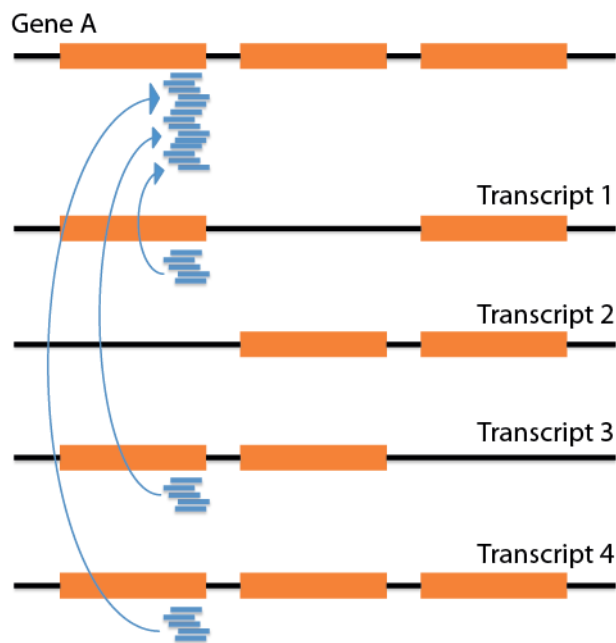

**Supplementary Fig. 1.** Schematic to illustrate transfer of mapped reads from transcript to genome coordinates.

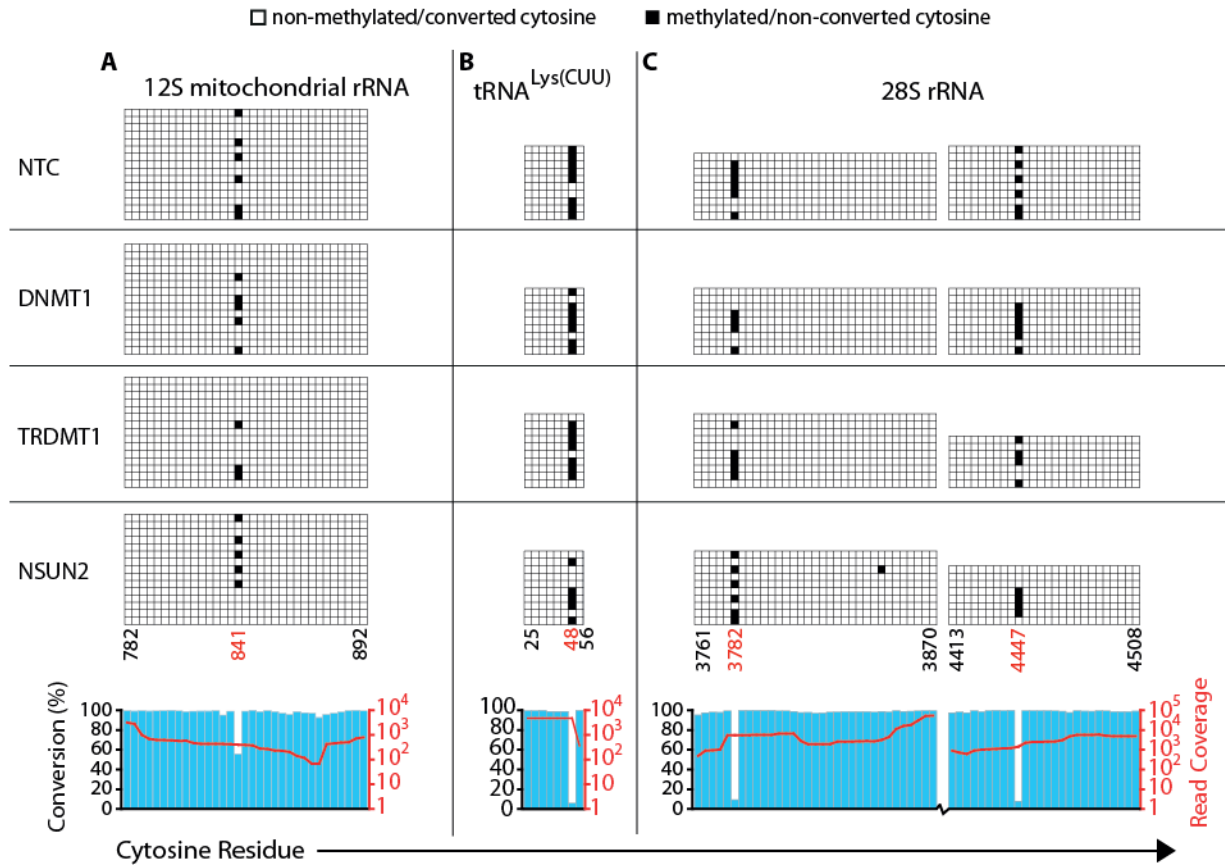

**Supplementary Fig. 2.** Analysis of methyltransferase target sites. HeLa cells were transfected with siRNAs targeting *DNMT1*, *TRDMT1* and *NSUN2* or a non-targeting control siRNA (NTC) as indicated on the left. Conventional bisulfite sequencing data was obtained as described in Fig. 1 and is shown for novel sites in (A) 12S mitochondrial rRNA and (B) tRNA<sup>Lys(CUU)</sup> as well as (C) two previously identified sites in 28S rRNA. Nucleotide positions highlighted in red designate m<sup>5</sup>C candidate sites identified by next generation sequencing. The corresponding next-generation sequencing results are also displayed (lower panels). See Fig. 4 for additional MTase target site data.

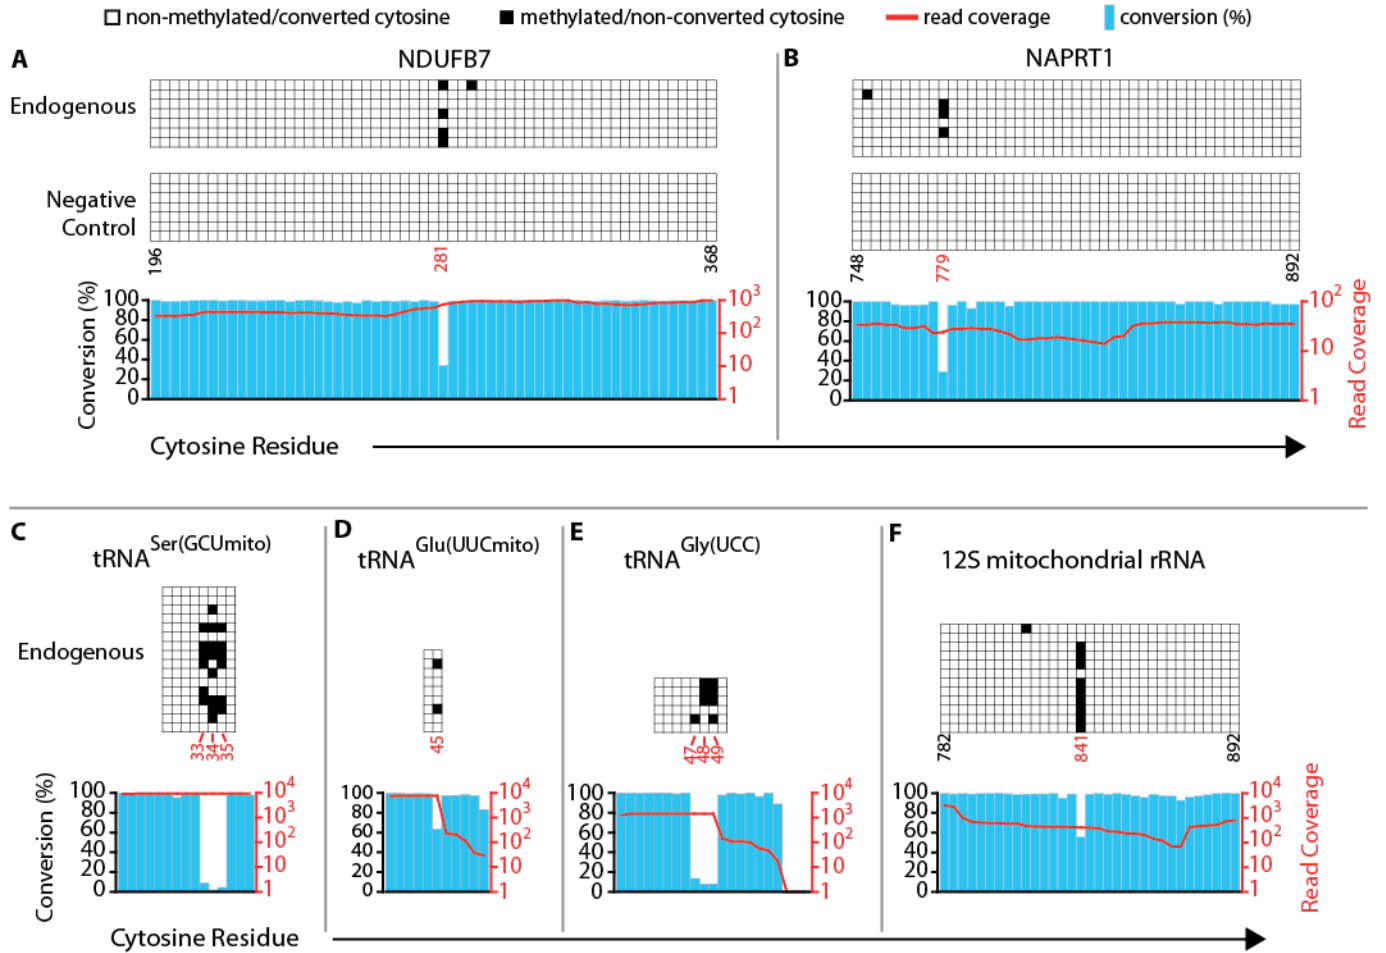

**Supplementary Fig. 3.** Validation of novel m<sup>5</sup>C candidate sites. Conventional bisulfite sequencing data is shown for novel sites in (A) NADH dehydrogenase 1 beta subcomplex 7 mRNA (*NDUF7*), (B) nicotinate phosphoribosyltransferase domain containing 1 (*NAPRT1*) mRNA, (C) mitochondrial tRNA<sup>Ser(GCU)</sup>, (D) mitochondrial tRNA<sup>Glu(UUC)</sup>, (E) tRNA<sup>Gly(UCC)</sup>, and (F) 12S mitochondrial rRNA. Top panels display results for endogenous transcripts, while data for spiked-in *in vitro* transcribed negative controls harboring the same sequence flanked by unique priming sites are also shown in middle panels for (A&B). The corresponding next-generation sequencing results are also displayed (lower panels). Numbering of cytosine positions is as described in Fig. 1, positions highlighted in red designate m<sup>5</sup>C candidate sites identified by next generation sequencing. See Fig. 3 for additional validation data.

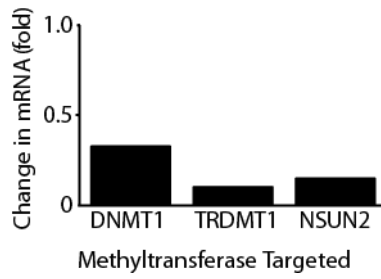

**Supplementary Fig. 4.** Quantitative PCR analysis to measure siRNA knockdown efficiency of targeted methyltransferases. The fold change in targeted MTase mRNA levels relative to non-targeting control MTase mRNA levels is shown. Data was normalized to *HPRT*. This data complements Fig. 4 and Supplementary Fig. 2.
